1 **A critique of common methods for comparing the scaling of vertical**  
2 **force production in flying insects**

3 **Authors:** Nicholas P. Burnett<sup>1\*</sup>, Emily Keliher<sup>1</sup>, Stacey A. Combes<sup>1</sup>

4 **Affiliations:** <sup>1</sup>Department of Neurobiology, Physiology, and Behavior, University of California  
5 – Davis, Davis, CA 95616

6 **Correspondence:** \*Corresponding author, email: [burnettnp@gmail.com](mailto:burnettnp@gmail.com)  
7

8 **Abstract:** Maximum vertical force production ( $F_{\text{vert}}$ ) is an integral measure of flight  
9 performance that generally scales with size. Numerous methods of measuring  $F_{\text{vert}}$  and body size  
10 exist, but few studies have compared how these methods affect the conclusions of scaling  
11 analyses. We compared two common techniques for measuring  $F_{\text{vert}}$  in bumblebees (*Bombus*  
12 *impatiens*) and mason bees (*Osmia lignaria*), and examined  $F_{\text{vert}}$  scaling using five size metrics.  
13  $F_{\text{vert}}$  results were similar with incremental or asymptotic load-lifting, but scaling analyses were  
14 sensitive to the size metric used. Analyses based on some size metrics indicated similar scaling  
15 exponents and coefficients between species, whereas other metrics indicated different  
16 coefficients. Furthermore,  $F_{\text{vert}}$  showed isometry with body lengths and fed and starved masses,  
17 but negative allometry with dry mass. We conclude that  $F_{\text{vert}}$  can be measured using either  
18 incremental or asymptotic loading but choosing a size metric for scaling studies requires careful  
19 consideration.

## 1 **Introduction**

2           Maximum vertical force production ( $F_{\text{vert}}$ ) is an integral component of flight performance,  
3 and has been examined across a diversity of volant taxa (Marden, 1987). To maintain flight  
4 altitude, animals must produce vertical forces that match their body weight (mass\*gravitational  
5 acceleration), and more elaborate flight behaviors require additional force production. For  
6 instance, animals that produce vertical forces exceeding their body weight can engage in vertical  
7 acceleration (e.g., evasive flight maneuvers) or load-carrying (e.g., transporting food or nesting  
8 materials) (Buchwald and Dudley, 2010; Marden, 1987; Wolf and Schmid-Hempel, 1989).  $F_{\text{vert}}$   
9 generally scales isometrically with flight muscle mass and body size in closely related taxa  
10 (Marden, 1987), but variation in  $F_{\text{vert}}$  scaling can exist between distantly related species due to  
11 differences in musculature, morphology, behavior, or kinematics (Chai et al., 1997; Dillon and  
12 Dudley, 2004; Marden, 1987). Although previous studies have compared techniques for  
13 measuring  $F_{\text{vert}}$  or quantifying body size in scaling analysis (Buchwald and Dudley, 2010; Cane,  
14 1987), these assessments explored only one of the variables involved (i.e., either  $F_{\text{vert}}$  or body  
15 size). Thus, the full range of effects that different methodologies can have on the outcome of  
16 interspecific scaling studies of vertical force production remains unknown.

17

### 18 *Measuring vertical force production*

19           The two simplest methods of measuring  $F_{\text{vert}}$ , incremental and asymptotic load-lifting,  
20 involve challenging animals to sustain flight with the heaviest added load that they can carry (see  
21 *Results & Discussion* for a discussion of alternative methods). In the incremental method,  
22 weights are attached to an animal and the animal is prompted to fly. After each successful flight,  
23 additional weights are added. This process is repeated until the animal can no longer fly, and the  
24 maximum load (body + added weights) reached before failure defines the animal's  $F_{\text{vert}}$ . The  
25 incremental method has been used on bats, birds, and insects (Marden, 1987), and on the  
26 bumblebee *Bombus impatiens* (Buchwald and Dudley, 2010). In the asymptotic method, a  
27 beaded string (i.e., small masses attached to a string at fixed intervals) is attached to an animal  
28 and the animal is prompted to fly vertically. As the animal takes off and increases altitude, it  
29 lifts more of the beaded string until it is unable to lift any additional mass; the weight of the  
30 animal's body plus the beads and string lifted indicates the animal's  $F_{\text{vert}}$ . This method has been

1 used on hummingbirds (Altshuler and Dudley, 2003; Chai et al., 1997), orchid bees (Dillon and  
2 Dudley, 2004), and *B. impatiens* (Buchwald and Dudley, 2010; Mountcastle and Combes, 2013).

3 The asymptotic method is advantageous because  $F_{\text{vert}}$  is measured in a single flight trial,  
4 whereas the incremental method requires numerous flights. However, the asymptotic method  
5 may be problematic for species with erratic, non-vertical flight behaviors (Su et al., 2020), and  
6 both methods can be difficult in species that will not tolerate being handled or having a mass  
7 attached to their body (Altshuler and Dudley, 2003). Comparisons of these methods have  
8 suggested that the incremental method may underestimate  $F_{\text{vert}}$  (Buchwald and Dudley, 2010),  
9 but this assessment has not been replicated or tested in additional species. Assessing the validity  
10 of these widespread methods of measuring  $F_{\text{vert}}$  is necessary to facilitate comparative studies of  
11 species exhibiting flight behaviors that may preclude one of the methods.

12

### 13 *Scaling performance by size*

14 All flying animals must produce, at minimum, enough force to support their own body  
15 weight, so  $F_{\text{vert}}$  generally increases with body size. Previous work has shown that  $F_{\text{vert}}$  often  
16 increases isometrically with body size (Buchwald and Dudley, 2010; Marden, 1987; Marden,  
17 1990), but with some exceptions (Dillon and Dudley, 2004). In bees (Apoidea), body size is  
18 commonly quantified using either a length measure (e.g., wing length, intertegular (IT) span) or a  
19 mass measure (e.g., fed, starved, or dry body mass). Are these metrics interchangeable for  
20 scaling analyses of flight performance? IT span (the distance between the tegulae at the wing  
21 bases) and wing length are morphological features that can be measured directly with calipers or  
22 through photographs, and are proportional to body mass in closely related taxa (Cane, 1987;  
23 Dillon and Dudley, 2004). Fed body mass is the body mass measured at some point before or  
24 after a flight trial; this measure can introduce variability because each bee may be carrying a  
25 different volume of nectar when selected for a flight trial (Marden, 1987). Starved (or empty)  
26 body mass is the body mass of a bee without any stored nectar, and thus, this measure represents  
27 the baseline body mass that the bee must lift to fly; it can be obtained by measuring body mass  
28 after squeezing a bee to cause regurgitation of nectar from the bee's honey sac, or crop  
29 (Buchwald and Dudley, 2010). However, this technique can introduce error because not all  
30 nectar is stored in the crop – up to 10% can be retained in the bee's midgut after regurgitation of  
31 the crop's contents (Gary and Lorenzen, 1976). Alternatively, empty body mass can be obtained

1 by weighing the bee after it is starved over some time period (e.g., 24 hours) to allow the bee to  
2 metabolize all of the nectar in its body, without allowing the bee to desiccate or die (Combes et  
3 al., 2020). Dry body mass is the body mass after desiccating a dead bee in an oven until it stops  
4 losing weight (Cane, 1987; Helm et al., 2021); this method can introduce error because solutes  
5 within nectar (or other fluids in the body) may remain in the bee after desiccation (especially if  
6 the bee was not starved beforehand), adding to the dry mass. Although IT span, wing length, and  
7 fed, starved, and dry body masses are among the simplest and most widespread body size  
8 measurements used in insect flight studies, the variability introduced by each of these metrics has  
9 not been compared across species in the context of flight performance.

10

### 11 *Study system*

12 Here, we compare two simple methodologies for quantifying  $F_{\text{vert}}$ , by performing both  
13 measurements on individual females of two bee species, the eastern bumblebee *Bombus*  
14 *impatiens* and the mason bee *Osmia lignaria*. We then test whether interspecific comparisons of  
15 flight performance, controlled for body size, depend on the body size metric used in the analyses.  
16 These species are in the superfamily Apoidea but differ in body size (most *O. lignaria* females  
17 are smaller than *B. impatiens* workers), morphology, and life history (*O. lignaria* are solitary and  
18 *B. impatiens* are primitively eusocial). *Bombus impatiens* is an established model organism for  
19 flight biomechanics studies (Buchwald and Dudley, 2010; Combes et al., 2020; Mountcastle and  
20 Combes, 2013), and *O. lignaria* is an emerging model for studies of flight biomechanics,  
21 reproductive physiology, and landscape ecology (Bosch and Kemp, 2000; Helm et al., 2021;  
22 Kemp et al., 2004; Vicens and Bosch, 2000). Both species are also sold commercially for use in  
23 crop pollination, as an alternative to honeybees. Thus, these species represent taxa that are not  
24 closely related, but may be inadvertently grouped together in broad analyses of flight  
25 performance across taxa.

26

### 27 **Materials and methods**

28 Cocoons of adult-wintering *Osmia lignaria* were purchased from a commercial supplier  
29 (Foothill Bee Ranch, Auburn, CA, USA) and maintained at 4°C. Individuals were moved to a  
30 flight cage for emergence, as needed for experiments. A mature colony of *Bombus impatiens*  
31 was purchased from a commercial supplier (Koppert Biological Systems, Romulus, MI, USA)

1 and maintained in a separate flight cage. Individuals in each cage were fed sucrose solution *ad*  
2 *libitum*, with fresh pollen weekly. All flight cages and experimental areas were held at 22-25°C.  
3 Active females (n = 25 for *O. lignaria*, n = 28 for *B. impatiens*) of each species were selected  
4 randomly for flight trials.

#### 6 *Flight performance*

7  $F_{\text{vert}}$  was measured on each individual using both the incremental and asymptotic  
8 methods, to allow for direct comparison. The order of the methods was alternated between  
9 individuals, with both tests performed during the same day, and testing methodology generally  
10 followed the descriptions by Buchwald and Dudley (2010) and Mountcastle and Combes (2013).  
11 Briefly, bees were cold-anesthetized at 4°C and a polyester thread was tied around the petiole of  
12 each individual (Mountcastle and Combes, 2013), near their center of lift (Buchwald and Dudley,  
13 2010; Dudley and Ellington, 1990; Ellington, 1984a), leaving a free end of thread approximately  
14 6 cm long. Once tied, bees were allowed to recover at room temperature for 10-20 minutes  
15 before any flight trials.

16 *Incremental method:* Individual beads (either 0.0250 or 0.0050 g in mass) were tied to the free  
17 end of thread around a bee's petiole. Prior to each flight trial, the mass of the bee, string, and  
18 beads were recorded. The bee was released into a flight arena and prompted to fly, using  
19 agitation with forceps if necessary (Fig. 1a). If the bee took off and sustained flight, additional  
20 beads were added, mass was recorded, and the flight trial was repeated until the bee was unable  
21 to fly with the weight applied. The maximum mass lifted by the bee was multiplied by  
22 gravitational acceleration to calculate the bee's  $F_{\text{vert}}$ .

23 *Asymptotic method:* Beads (either 0.0250 or 0.005 g in mass) were attached to a polyester string,  
24 approximately 30 cm in length, at intervals of 2 cm. Based on preliminary trials, the strings used  
25 in *O. lignaria* flight tests had beads with mass = 0.0050 g, and the strings used in *B. impatiens*  
26 flight tests had beads with mass = 0.0250 g. Before and after each flight trial, the mass of the  
27 bee, along with the 6-cm thread tied around its petiole, was measured. During a flight trial, the  
28 bee was tied to the beaded string and prompted to fly, using agitation with forceps if necessary  
29 (Fig. 1b). Flights were recorded with a video camera at 30-60 frames per second, and the  
30 maximum number of beads lifted during each sustained vertical flight was counted. Up to five  
31 successful flight trials were recorded per individual.  $F_{\text{vert}}$  was calculated as the sum of bee mass

1 (averaged between the pre- and post-flight mass) and the lifted mass of the beaded string,  
2 multiplied by gravitational acceleration. The lifted mass of the beaded string was calculated as  
3 the maximum number of beads lifted during the flights, multiplied by the average mass per bead  
4 (total mass of string and bead, divided by the number of beads on the string).

5 In both incremental and asymptotic methods, we consider the maximum lifted mass to be  
6 the observed maximum lifted mass, following Mountcastle and Combes (2013). However, other  
7 studies have considered the maximum lifted mass to be the mean between the observed  
8 maximum lifted mass and the next-highest mass that the bee was unable to lift (Buchwald and  
9 Dudley, 2010; Marden, 1987). While this variation in methodology can impact comparisons of  
10 data between studies, it does not affect the conclusions of the present study because the same  
11 approach was used for all trials.

12

### 13 *Body size*

14 After all flight trials using both methods were completed for each bee, the string was  
15 removed from the petiole and body mass was measured to the nearest 0.0001 g with a digital  
16 balance (providing the fed mass). The bee was placed in a separate dish with only a wet paper  
17 towel and left for 24 h at room temperature to consume any nectar remaining in its body. After  
18 24 h, body mass was measured again (providing the starved mass), and the bee was placed in a  
19 freezer until all experiments were completed.

20 Once all flight tests were completed, we removed bees from the freezer, photographed  
21 them, and measured their intertegular (IT) span and forewing length (hereafter wing length) to  
22 the nearest 0.01 mm using ImageJ (v 1.53f51) (Schneider et al., 2012). Following these  
23 geometric measurements, bees were placed in a drying oven at 45°C, following Cane (1987), and  
24 dried for several days until all bees were no longer losing mass (providing the dry mass).

25

### 26 *Statistical analysis*

27 Within each species, we compared  $F_{\text{vert}}$  measurements between the incremental and  
28 asymptotic methods using paired  $t$ -tests (paired by individual).

29 We next compared  $F_{\text{vert}}$ -size scaling between the species using the five body size metrics  
30 described above.  $F_{\text{vert}}$  and size data for each species can be represented by the power function  $Y$   
31  $= \beta X^\alpha$ , where  $Y$  is  $F_{\text{vert}}$ ,  $\beta$  is a scaling coefficient,  $X$  is body size, and  $\alpha$  is a scaling exponent. This

1 power function can also be expressed in a logarithmic form:  $\log_{10}Y = \log_{10}\beta + \alpha\log_{10}X$ . Here,  $\beta$   
2 is the  $Y$ -intercept of the  $\log_{10}$ -transformed model and  $\alpha$  is the slope of the  $\log_{10}$ -transformed  
3 model (Vogel, 2013).

4 We  $\log_{10}$ -transformed all data to conduct an ANCOVA (analysis of covariance) scaling  
5 analysis for each body size metric, using  $F_{\text{vert}}$  as the dependent variable, species as the  
6 independent variable, and body size as the covariate. We first tested for a statistical interaction  
7 between species and body size (i.e., different scaling exponents between species); if none was  
8 found, we then tested for a statistical effect of species across body size (i.e., different scaling  
9 coefficients between species). Last, we tested whether  $F_{\text{vert}}$  scaled isometrically (i.e., a scaling  
10 exponent = 1 for body masses, 3 for body lengths) with each body size metric, using Wald tests.  
11 All analyses were done in R Statistical Software (R Core Team, 2020).

12

## 13 **Results and Discussion**

14

15 *Size metrics affect the outcome of scaling analyses, but  $F_{\text{vert}}$  methods do not*

16  $F_{\text{vert}}$ -size scaling depended strongly on the size metric used, but not on the method of  
17 measuring  $F_{\text{vert}}$ . The incremental and asymptotic methods for quantifying  $F_{\text{vert}}$  produced similar  
18 results within each species (Fig. 2). For *Osmia lignaria*, the methods differed by  $3.0 \pm 10.4\%$   
19 (mean  $\pm$  SD), calculated as asymptotic – incremental, divided by the average of the two methods  
20 (paired  $t$ -test,  $t = -1.310$ ,  $df = 19$ ,  $p = 0.206$ ). For *Bombus impatiens*, the methods differed by  $1.6$   
21  $\pm 12.6\%$  ( $t = 0.808$ ,  $df = 20$ ,  $p = 0.428$ ).

22 Plotting  $F_{\text{vert}}$  as a function of the five body size metrics revealed no differences in scaling  
23 exponent (i.e., slope of the  $\log_{10}$ -transformed data) between species (ANCOVA,  $p > 0.05$ ).  
24 However, the scaling coefficient (i.e., intercept of the  $\log_{10}$ -transformed variables) differed  
25 significantly between species ( $p < 0.005$ ) when IT span or dry mass was used as the size metric  
26 but was similar between species with the other three size metrics.

27 Using values from the incremental method (asymptotic results are similar),  $F_{\text{vert}}$  scaled  
28 isometrically (expected scaling exponent  $\alpha = 3$ ) with wing length ( $\alpha = 2.778$ ;  $F_{(1,44)} = 3.942$ ,  $p =$   
29  $0.053$ ) and IT span ( $\alpha = 2.711$ ;  $F_{(1,43)} = 3.262$ ,  $p = 0.079$ ).  $F_{\text{vert}}$  also scaled isometrically  
30 (expected  $\alpha = 1$ ) with fed mass ( $\alpha = 1.052$ ;  $F_{(1,45)} = 2.493$ ,  $p = 0.121$ ) and starved mass ( $\alpha =$   
31  $0.980$ ;  $F_{(1,47)} = 0.450$ ,  $p = 0.506$ ) (Fig. 3), but showed negative allometry with dry mass ( $\alpha =$

1 0.851;  $F_{(1,44)} = 11.414$ ,  $p < 0.005$ ). With IT span and dry mass, the scaling coefficient  $\beta$  was  
2 0.187 and 0.137 lower, respectively, for *O. lignaria* than for *B. impatiens* ( $p < 0.005$ )

3  $F_{\text{vert}}$  scaling was nearly identical between *O. lignaria* and *B. impatiens* when wing length,  
4 fed mass, and starved mass were used as size metrics. Thus, analyses using these metrics would  
5 suggest that *B. impatiens* produces more vertical force only because it is a larger bee than *O.*  
6 *lignaria*, and that both species have similar  $F_{\text{vert}}$  when normalized to their fed or starved mass  
7 (paired  $t$ -tests,  $p > 0.05$ ; Fig. 3f). However, different scaling patterns emerge with IT span and  
8 dry mass, and  $F_{\text{vert}}$  normalized to dry mass differs significantly between species ( $p < 0.005$ ).  
9 This would suggest that interspecific variation in  $F_{\text{vert}}$  is not due solely to variation in body size,  
10 but rather to some other factor such as physiology or kinematics.

11  
12 *Alternative methods and considerations for future studies*

13 Here we show that the incremental and asymptotic methods of measuring  $F_{\text{vert}}$  produce  
14 equivalent results for *B. impatiens* and *O. lignaria*. This suggests that either method can measure  
15  $F_{\text{vert}}$  accurately, and that researchers can choose whichever method is most feasible given their  
16 study subjects' flight behavior. However, not all previous studies comparing these methods  
17 follow the same pattern. For instance, Buchwald and Dudley (2010) found that the incremental  
18 method systematically underestimated  $F_{\text{vert}}$  in *B. impatiens*, a result that could be due to their  
19 different method of applying incremental weights (gluing rather than tying weights to bees).  
20 Estimates of  $F_{\text{vert}}$  can also depend on whether the assay involves a steady flight behavior  
21 (hovering or slow, level flight, as in the incremental and asymptotic methods) or a dynamic flight  
22 behavior (rapid accelerations). Su et al. (2020) quantified  $F_{\text{vert}}$  in a dragonfly (*Pantala*  
23 *flavescens*) using a dynamic flight behavior, in which the animal was loaded with weights and  
24 then dropped. The dragonfly's rapid acceleration as it stopped its fall towards the floor and then  
25 ascended upwards (a "pull-up" response) can be used to calculate  $F_{\text{vert}}$  (mass\*maximum vertical  
26 acceleration). However, these values were much higher than measurements from similar species  
27 in which sustained flight assays of  $F_{\text{vert}}$  were used (Su et al., 2020), suggesting that assays for  
28  $F_{\text{vert}}$  based on sustained flight behavior may be broadly incompatible with assays based on  
29 dynamic flight behavior.

30 Another common tool for assessing maximum flight performance is the variable gas  
31 mixture method. With all else being equal, the vertical force (lift) produced by a flying animal



1 will decrease as air density decreases (Vogel, 1996). Variable gas mixtures can be used to alter  
2 air density while maintaining constant oxygen concentration, to identify the minimum air density  
3 in which a flying animal can generate enough vertical force to support its own body weight  
4 (Dudley and Chai, 1996; Roberts et al., 2004). When filmed with high-speed cameras, measured  
5 wing kinematics and morphological details can be used to estimate the animal's average vertical  
6 force production (Dudley, 1995), by using the hovering aerodynamic model of Ellington  
7 (1984b). Thus, variable gas mixtures can provide an informative metric of peak flight  
8 performance, but the methodology requires significantly more equipment (sealed chamber,  
9 pressurized gas canisters, high-speed cameras) and detailed kinematic analysis, and the data are  
10 not directly comparable to force measurements from the incremental and asymptotic load-lifting  
11 methods, or even the dynamic  $F_{\text{vert}}$  assays using the loaded “pull-up” response.

12 Like flight performance assays, body size metrics may not always be interchangeable or  
13 comparable, especially between distantly related species. For instance, IT span may be useful  
14 for comparing size within bee species, but tegulae (and thus IT span) are only found in certain  
15 insect groups. Single linear dimensions of animals may also be misleading, as three-dimensional  
16 differences in morphology between species or across ontogeny may not be captured by a linear  
17 measurement. In some past studies, the scaling of flight performance across large and diverse  
18 groups of organisms has been examined using flight muscle mass (rather than total body mass)  
19 as the size metric, because the flight muscles are the tissues that actuate the wings (Buchwald  
20 and Dudley, 2010; Dudley, 1995; Marden, 1987; Marden, 1990). However, different species –  
21 and even individuals of different sizes within a species – may require different techniques for  
22 isolating flight muscle, which could bias morphological comparisons. For instance, flight  
23 muscle in bees and other insects can be quantified via dissection or chemical digestion of the  
24 thorax, and each technique has its own unique sources of error (e.g., correctly dissecting or  
25 digesting all of the flight muscle, and *only* flight muscle) (Buchwald and Dudley, 2010; Dudley,  
26 1995; Marden, 1987). Thus, it is imperative for researchers to confirm that the size metrics used  
27 in inter- or intraspecific comparisons of flight performance are compatible across the range of  
28 organisms studied.

29

30 **References**

- 1 **Altshuler, D. L. and Dudley, R.** (2003). Kinematics of hovering hummingbird flight along  
2 simulated and natural elevational gradients. *J Exp Biol* **206**, 3139–3147.
- 3 **Bosch, J. and Kemp, W. P.** (2000). Development and Emergence of the Orchard Pollinator  
4 *Osmia lignaria* (Hymenoptera: Megachilidae). *Environ Entomol* **29**, 8–13.
- 5 **Buchwald, R. and Dudley, R.** (2010). Limits to vertical force and power production in  
6 bumblebees (Hymenoptera: *Bombus impatiens*). *J Exp Biol* **213**, 426–432.
- 7 **Cane, J. H.** (1987). Estimation of bee size using intertegular span (Apoidea). *J Kans Entomol*  
8 *Soc* **60**, 145–147.
- 9 **Chai, P., Chen, J. S. and Dudley, R.** (1997). Transient hovering performance of hummingbirds  
10 under conditions of maximal loading. *J Exp Biol* **200**, 921–929.
- 11 **Combes, S. A., Gagliardi, S. F., Switzer, C. M. and Dillon, M. E.** (2020). Kinematic flexibility  
12 allows bumblebees to increase energetic efficiency when carrying heavy loads. *Sci Adv* **6**,  
13 eaay3115.
- 14 **Dillon, M. E. and Dudley, R.** (2004). Allometry of maximum vertical force production during  
15 hovering flight of neotropical orchid bees (Apidae: Euglossini). *J Exp Biol* **207**, 417–425.
- 16 **Dudley, R.** (1995). Extraordinary flight performance of orchid bees (Apidae: Euglossini)  
17 hovering in heliox (80% He/20% O<sub>2</sub>). *J Exp Biol* **198**, 1065–1070.
- 18 **Dudley, R. and Chai, P.** (1996). Animal flight mechanics in physically variable gas mixtures. *J*  
19 *Exp Biol* **199**, 1881–1885.
- 20 **Dudley, R. and Ellington, C. P.** (1990). Mechanics of forward flight in bumblebees: I.  
21 Kinematics and morphology. *J Exp Biol* **148**, 19–52.
- 22 **Ellington, C. P.** (1984a). The aerodynamics of hovering insect flight. III. Kinematics. *Phil Trans*  
23 *R Soc Lond B* **305**, 41–78.
- 24 **Ellington, C. P.** (1984b). The aerodynamics of hovering insect flight. VI. Lift and power  
25 requirements. *Phil Trans R Soc Lond B* **305**, 145–181.
- 26 **Gary, N. E. and Lorenzen, K.** (1976). A method for collecting the honey-sac contents from  
27 honeybees. *J Apic Res* **15**, 73–79.
- 28 **Helm, B. R., Baldwin, M. A., Rinehart, J. P., Yocum, G. D., Greenlee, K. J. and Bowsher, J.**  
29 **H.** (2021). Body and wing allometries reveal flight-fecundity tradeoff in response to  
30 larval provisioning in *Osmia lignaria* (Hymenoptera: Megachilidae). *J Insect Sci* **21**, 11.
- 31 **Kemp, W. P., Bosch, J. and Dennis, B.** (2004). Oxygen consumption during the life cycles of  
32 the prepupa-wintering bee *Megachile rotundata* and the adult-wintering bee *Osmia*  
33 *lignaria* (Hymenoptera: Megachilidae). *Ann Entomol Soc Am* **97**, 161–170.

- 1 **Marden, J. H.** (1987). Maximum lift production during takeoff in flying animals. *J Exp Biol*  
2 **130**, 235–258.
- 3 **Marden, J. H.** (1990). Maximum load-lifting and induced power output of Harris' Hawks are  
4 general functions of flight muscle mass. *J Exp Biol* **149**, 511–514.
- 5 **Mountcastle, A. M. and Combes, S. A.** (2013). Wing flexibility enhances load-lifting capacity  
6 in bumblebees. *Proc. R. Soc. B.* **280**, 20130531.
- 7 **R Core Team** (2020). *R: A language and environment for statistical computing*. Vienna, Austria.
- 8 **Roberts, S. P., Harrison, J. F. and Dudley, R.** (2004). Allometry of kinematics and energetics  
9 in carpenter bees (*Xylocopa varipuncta*) hovering in variable-density gases. *J Exp Biol*  
10 **207**, 993–1004.
- 11 **Schneider, C. A., Rasband, W. S. and Eliceiri, K. W.** (2012). NIH Image to ImageJ: 25 years  
12 of image analysis. *Nat Methods* **9**, 671–675.
- 13 **Su, G., Dudley, R., Pan, T., Zheng, M., Peng, L. and Li, Q.** (2020). Maximum aerodynamic  
14 force production by the wandering glider dragonfly (*Pantala flavescens*, Libellulidae). *J*  
15 *Exp Biol* **223**, jeb218552.
- 16 **Vicens, N. and Bosch, J.** (2000). Weather-dependent pollinator activity in an apple orchard,  
17 with special reference to *Osmia cornuta* and *Apis mellifera* (Hymenoptera: Megachilidae  
18 and Apidae). *Environ Entomol* **29**, 413–420.
- 19 **Vogel, S.** (1996). *Life in moving fluids: the physical biology of flow*. 2. ed., rev.expanded, 2.  
20 printing and first paperback printing. Princeton, NJ: Princeton Univ. Press.
- 21 **Vogel, S.** (2013). *Comparative biomechanics: life's physical world*. 2. ed. Princeton, NJ:  
22 Princeton Univ. Press.
- 23 **Wolf, T. J. and Schmid-Hempel, P.** (1989). Extra loads and foraging life span in honeybee  
24 workers. *J Anim Ecol* **58**, 943.

25

26

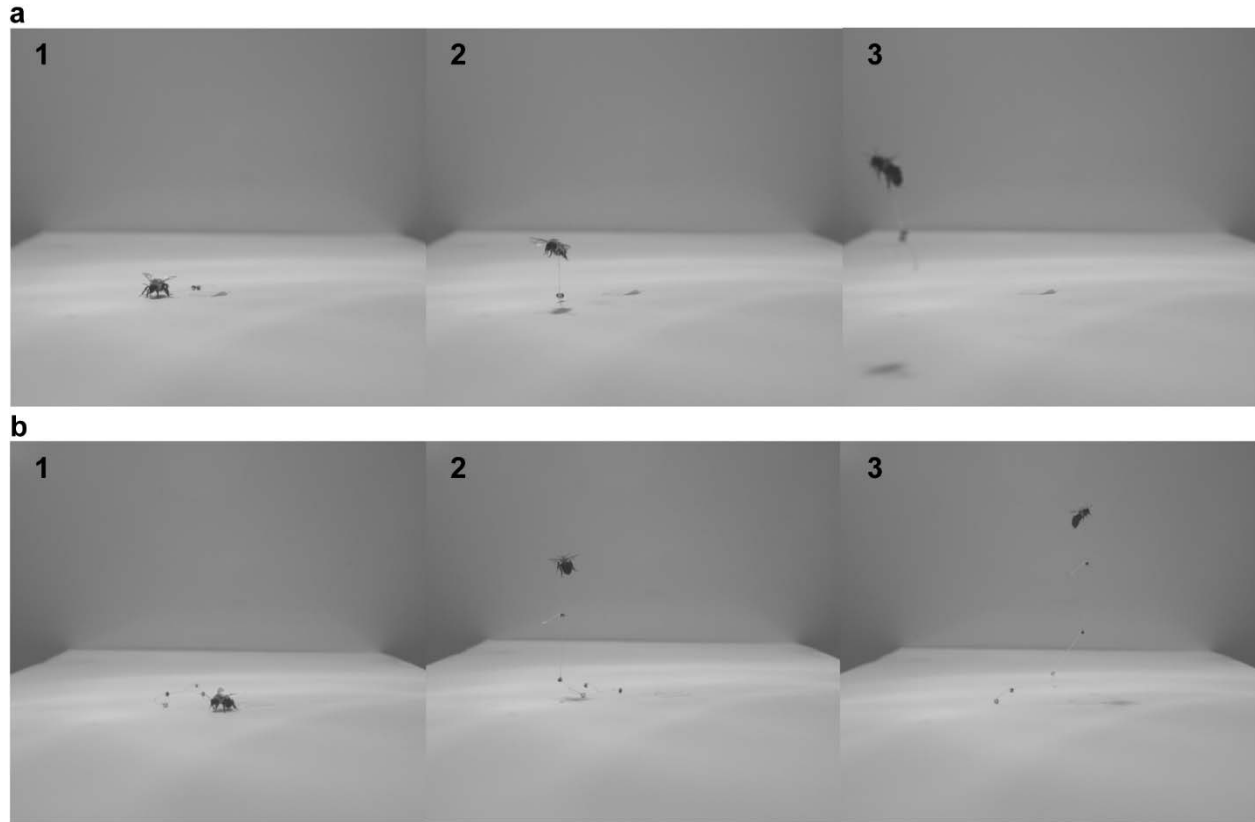

1  
2 **Figure 1. Examples of the (a) incremental and (b) asymptotic methods for measuring**  
3 **maximum vertical force production.** Each example shows a three-photograph sequence of a  
4 single flight attempt, using a female *Bombus impatiens*.

1

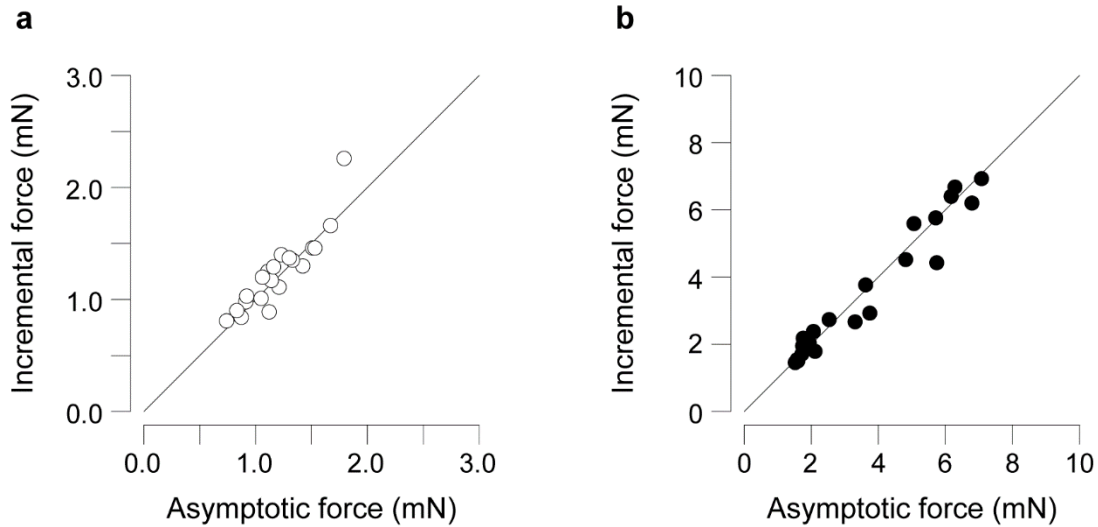

2

3 **Figure 2. Paired measurements of vertical force production show that the incremental and**  
4 **asymptotic methods produce similar results.** Paired  $F_{\text{vert}}$  measurements using both methods in

5 each individual are shown for (a) *Osmia lignaria* (n = 25) and (b) *Bombus impatiens* (n = 28).

6 Horizontal axes show  $F_{\text{vert}}$  measured with the asymptotic method and vertical axes show  $F_{\text{vert}}$

7 measured with the incremental method. The line in each panel shows a slope = 1. In both cases,

8 incremental and asymptotic methods produced statistically similar results (paired *t*-tests,  $p >$

9 0.05).

10

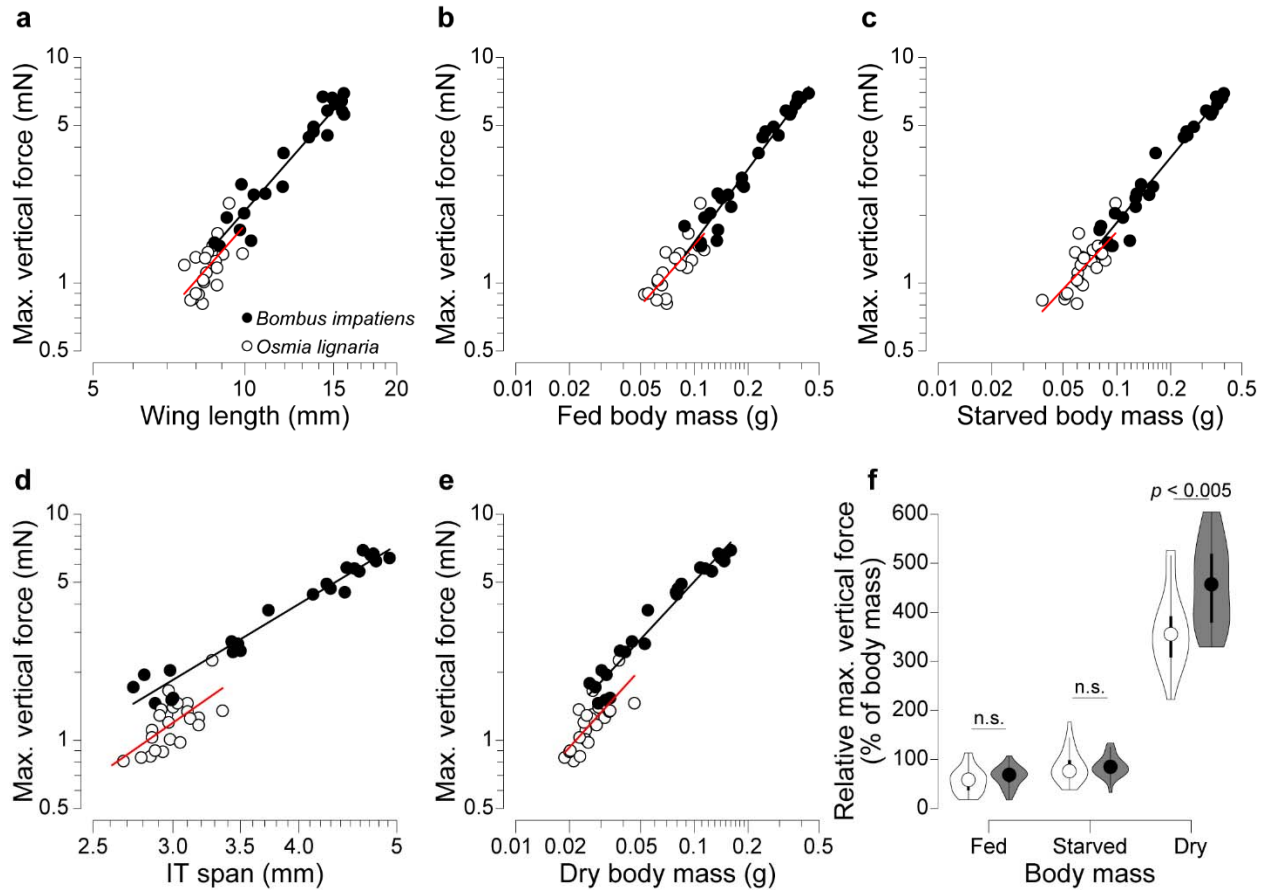

1  
2 **Figure 3. Inter-specific scaling analyses of maximum vertical force production lead to**  
3 **different conclusions depending on the size metric used.** *Bombus impatiens* and *Osmia*  
4 *lignaria* display statistically similar scaling exponents and coefficients when  $F_{\text{vert}}$  is expressed as  
5 a function of (a) wing length, (b) fed body mass, or (c) starved body mass (ANCOVA,  $p > 0.05$ ).  
6 The two species display similar scaling exponents but significantly different coefficients (i.e.,  $Y$ -  
7 intercepts) when  $F_{\text{vert}}$  is expressed as a function of (d) IT span or (e) dry body mass ( $p < 0.005$ ).  
8 (f) Mass-specific  $F_{\text{vert}}$  is similar in *B. impatiens* and *O. lignaria* if  $F_{\text{vert}}$  is normalized to fed or  
9 starved mass, but significantly larger in *B. impatiens* if  $F_{\text{vert}}$  is normalized to dry mass ( $t$ -tests,  $p$   
10  $< 0.05$  for significance). In (f), circles show medians, bars show 25<sup>th</sup> and 75<sup>th</sup> percentiles, and  
11 violin plots shown the kernel density-smooth representations of the frequency distributions.  
12 White symbols represent *O. lignaria*, and black/gray symbols represent *B. impatiens*.
